# Supplementary material
Source: publisher site journal article supplement (https://www.dovepress.com/get_supplementary_file.php?f=375572.docx)
Supplement: Supplementary file 1 [file get_supplementary_file.php]

Figure S1


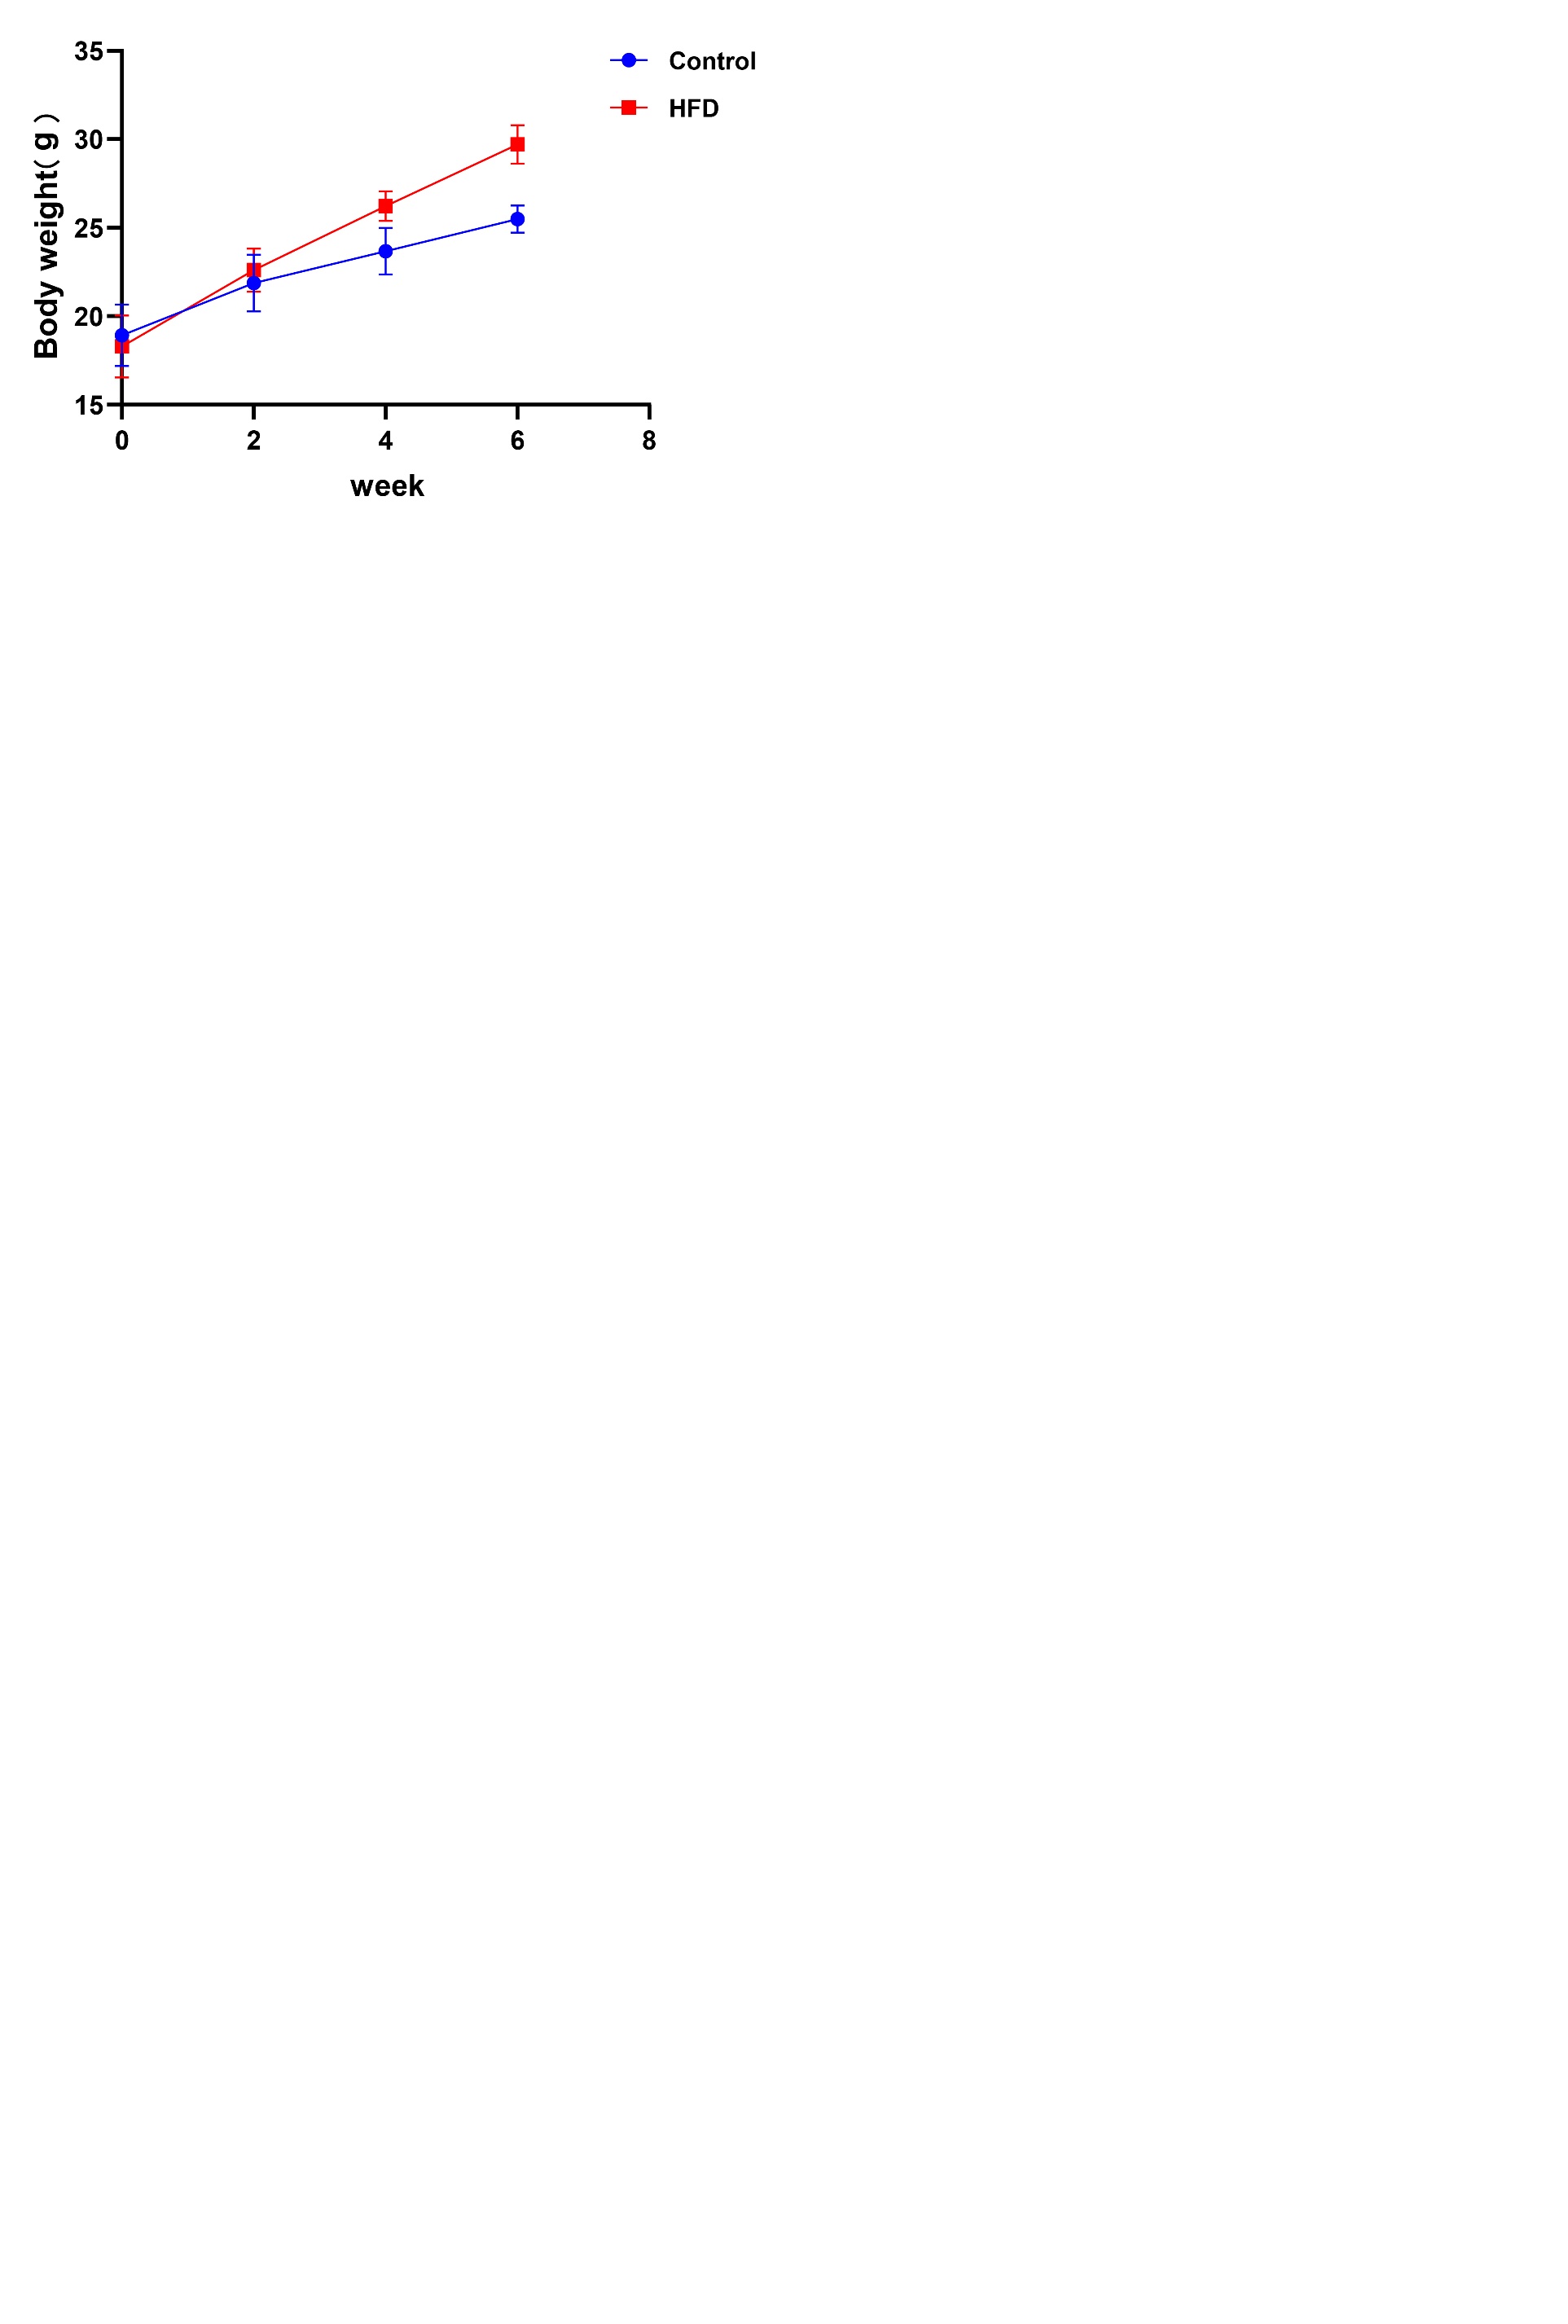


Figure Legends: Figure S1 Body weight of mice fed a control diet and a high-fat diet. Control (n=6), HFD (n=40).

Table S1 D12492, research diets, the USA

| **Product #D12492** |  | **gm%** | **kcal%** |
| --- | --- | --- | --- |
| Protein |  | 26.2 | 20 |
| Carbohydrate |  | 26.3 | 20 |
| Fat |  | 34.9 | 60 |
|  | **Total** |  | 100 |
|  | **kcal/gm** | 5.24 |  |
| **Ingredient** |  | **gm** | **kcal** |
| Casein, 30 Mesh |  | 200 | 800 |
| L-Cystine |  | 3 | 12 |
|  |  |  |  |
| Corn Starch |  | 0 | 0 |
| Maltodextrin 10 |  | 125 | 500 |
| Sucrose |  | 68.8 | 275.2 |
|  |  |  |  |
| Cellulose, BW200 |  | 50 | 0 |
|  |  |  |  |
| Soybean Oil |  | 25 | 225 |
| Lard* |  | 245 | 2205 |
|  |  |  |  |
| Mineral Mix S10026 |  | 10 | 0 |
| DiCalcium Phosphate |  | 13 | 0 |
| Calcium Carbonate |  | 5.5 | 0 |
| Potassium Citrate, 1 H2O |  | 16.5 | 0 |
|  |  |  |  |
| Vitamin Mix V10001 |  | 10 | 40 |
| Choline Bitartrate |  | 2 | 0 |
|  |  |  |  |
| FD&C Blue Dye #1 |  | 0.05 | 0 |
| **Total** |  | **773.85** | **4057** |

Formulated by E. A. Ulman, Ph.D., Research Diets, Inc., 8/26/98 and 3/11/99.

*Typical analysis of cholesterol in lard = 0.72 mg/gram.

Cholesterol (mg)/4057 kcal = 216.4

Cholesterol (mg)/kg = 279.6

Table S2 M10110C2, Moldiets, China

| **Product #M10110C2** |  | **gm%** | **kcal%** |
| --- | --- | --- | --- |
| Protein |  | 19.2 | 20 |
| Carbohydrate |  | 67.3 | 70 |
| Fat |  | 4.3 | 10 |
|  | **Total** |  | 100 |
|  | **kcal/gm** | 3.85 |  |
| **Ingredient** |  | **gm** | **kcal** |
| Casein, 30 Mesh |  | 200 | 800 |
| L-Cystine |  | 3 | 12 |
|  |  |  |  |
| Corn Starch |  | 506.2 | 2024.8 |
| Maltodextrin 10 |  | 125 | 500 |
| Sucrose |  | 68.8 | 275.2 |
|  |  |  |  |
| Cellulose, BW200 |  | 50 | 0 |
|  |  |  |  |
| Soybean Oil |  | 25 | 225 |
| Lard* |  | 20 | 180 |
|  |  |  |  |
| Mineral Mix S10026 |  | 10 | 0 |
| DiCalcium Phosphate |  | 13 | 0 |
| Calcium Carbonate |  | 5.5 | 0 |
| Potassium Citrate, 1 H2O |  | 16.5 | 0 |
|  |  |  |  |
| Vitamin Mix V10001 |  | 10 | 40 |
| Choline Bitartrate |  | 2 | 0 |
|  |  |  |  |
| FD&C Yellow Dye #5 |  | 0.04 | 0 |
| FD&C Blue Dye #1 |  | 0.01 | 0 |
| **Total** |  | **1055.05** | **4057** |

*Typical analysis of cholesterol in lard = 0.72 mg/gram.

Cholesterol (mg)/4057 kcal = 54.4

Cholesterol (mg)/kg = 51.6

Table S3 Species relative abundance table at phylum level

| **Taxonomy** | **Control1** | **Control2** | **Control3** | **Control4** | **Model1** | **Model2** | **Model3** | **Model4** | **TPS-H1** | **TPS-H2** | **TPS-H3** | **TPS-H4** | **Tax_detail** |
| --- | --- | --- | --- | --- | --- | --- | --- | --- | --- | --- | --- | --- | --- |
| Firmicutes | 0.27585 | 0.461139 | 0.274583 | 0.291638 | 0.435411 | 0.814955 | 0.651398 | 0.459629 | 0.109395 | 0.231361 | 0.22795 | 0.288057 | k__Bacteria;p__Firmicutes; |
| Bacteroidota | 0.494469 | 0.351452 | 0.35747 | 0.561081 | 0.323238 | 0.108103 | 0.210579 | 0.344313 | 0.544927 | 0.61914 | 0.597724 | 0.60825 | k__Bacteria;p__Bacteroidota; |
| Verrucomicrobiota | 0.162314 | 0.086249 | 0.281698 | 0.016153 | 0.005384 | 0.005287 | 0.004337 | 0.004215 | 0.006067 | 0.025753 | 0.005726 | 0.01016 | k__Bacteria;p__Verrucomicrobiota; |
| Desulfobacterota | 0.017177 | 0.027921 | 0.024413 | 0.036887 | 0.134197 | 0.038763 | 0.056184 | 0.136025 | 0.013522 | 0.008186 | 0.016251 | 0.009258 | k__Bacteria;p__Desulfobacterota; |
| Proteobacteria | 0.013205 | 0.011451 | 0.038422 | 0.002461 | 0.002875 | 0.008722 | 0.049191 | 0.006578 | 0.106739 | 0.048753 | 0.03506 | 0.026679 | k__Bacteria;p__Proteobacteria; |
| Fusobacteriota | 0 | 0 | 0 | 0 | 0 | 0 | 0.002095 | 0 | 0.000292 | 0.01993 | 0.092462 | 0.010769 | k__Bacteria;p__Fusobacteriota; |
| Campilobacterota | 0.026995 | 0.023122 | 0.006749 | 0.080304 | 0.076455 | 0.008357 | 0.004191 | 0.020953 | 0.008771 | 0.003582 | 0.005336 | 0.003314 | k__Bacteria;p__Campilobacterota; |
| Actinobacteriota | 0.007285 | 0.036571 | 0.012499 | 0.008113 | 0.011183 | 0.007187 | 0.013425 | 0.017372 | 0.075651 | 0.031966 | 0.016421 | 0.041078 | k__Bacteria;p__Actinobacteriota; |
| Acidobacteriota | 0 | 0 | 0 | 0 | 0 | 0 | 0 | 0 | 0.026874 | 0 | 0 | 0 | k__Bacteria;p__Acidobacteriota; |
| Chloroflexi | 0 | 0 | 0 | 0 | 0 | 0 | 0 | 0 | 0.024315 | 0 | 0 | 0 | k__Bacteria;p__Chloroflexi; |
| Gemmatimonadota | 0 | 0 | 0 | 0 | 0 | 0 | 0 | 0 | 0.02317 | 0 | 0 | 0 | k__Bacteria;p__Gemmatimonadota; |
| Methylomirabilota | 0 | 0 | 0 | 0 | 0 | 0 | 0 | 0 | 0.015398 | 0 | 0 | 0 | k__Bacteria;p__Methylomirabilota; |
| Deferribacterota | 0.000658 | 0.000365 | 0 | 0.001316 | 0.008771 | 0.000536 | 0.000195 | 0.00229 | 0.000219 | 0 | 0.000122 | 0 | k__Bacteria;p__Deferribacterota; |
| Synergistota | 0 | 0 | 0.004069 | 0 | 0 | 0 | 0.004337 | 0 | 0 | 0.007626 | 0 | 7.31E-05 | k__Bacteria;p__Synergistota; |
| Crenarchaeota | 0 | 0 | 0 | 0 | 0 | 0 | 0 | 0 | 0.007066 | 0 | 0 | 0 | k__Archaea;p__Crenarchaeota; |
| Cyanobacteria | 0.000195 | 0.000268 | 9.75E-05 | 0 | 0 | 7.31E-05 | 9.75E-05 | 0.000755 | 0.006383 | 0.001973 | 0.001413 | 0.001169 | k__Bacteria;p__Cyanobacteria; |
| Armatimonadota | 0 | 0 | 0 | 0 | 0 | 0 | 0 | 0 | 0.006067 | 0 | 0 | 0 | k__Bacteria;p__Armatimonadota; |
| Myxococcota | 0 | 0 | 0 | 0 | 0 | 0 | 0 | 0 | 0.005263 | 0 | 0 | 0 | k__Bacteria;p__Myxococcota; |
| Entotheonellaeota | 0 | 0 | 0 | 0 | 0 | 0 | 0 | 0 | 0.005214 | 0 | 0 | 0 | k__Bacteria;p__Entotheonellaeota; |
| Patescibacteria | 0.000292 | 0.000244 | 0 | 0.00056 | 0.000926 | 0.002656 | 0.00268 | 0.004824 | 0.001559 | 0 | 0.000341 | 0.000122 | k__Bacteria;p__Patescibacteria; |
| Spirochaetota | 0.001291 | 0.001218 | 0 | 0.001437 | 0.001559 | 0.002948 | 0 | 0.002241 | 0 | 0 | 2.44E-05 | 0.000828 | k__Bacteria;p__Spirochaetota; |
| Nitrospirota | 0 | 0 | 0 | 0 | 0 | 0 | 0 | 0 | 0.00229 | 0 | 0 | 0 | k__Bacteria;p__Nitrospirota; |
| Elusimicrobiota | 0.000122 | 0 | 0 | 0 | 0 | 0 | 0 | 0.000195 | 0.001169 | 0.00056 | 0.000414 | 0.000122 | k__Bacteria;p__Elusimicrobiota; |
| Euryarchaeota | 0.000146 | 0 | 0 | 0 | 0 | 4.87E-05 | 2.44E-05 | 0.000609 | 0.000219 | 0.001145 | 0.000609 | 0.000122 | k__Archaea;p__Euryarchaeota; |
| NB1-j | 0 | 0 | 0 | 0 | 0 | 0 | 0 | 0 | 0.000901 | 0 | 0 | 0 | k__Bacteria;p__NB1-j; |
| Bdellovibrionota | 0 | 0 | 0 | 0 | 0 | 0 | 0 | 0 | 0.000658 | 0 | 0 | 0 | k__Bacteria;p__Bdellovibrionota; |
| Deinococcota | 0 | 0 | 0 | 0 | 0 | 0 | 0 | 0 | 0.000512 | 0 | 0 | 0 | k__Bacteria;p__Deinococcota; |
| Thermoplasmatota | 0 | 0 | 0 | 0 | 0 | 0 | 0 | 0 | 0.000365 | 0 | 0 | 0 | k__Archaea;p__Thermoplasmatota; |
| Latescibacterota | 0 | 0 | 0 | 0 | 0 | 0 | 0 | 0 | 0.000268 | 0 | 0 | 0 | k__Bacteria;p__Latescibacterota; |
| MBNT15 | 0 | 0 | 0 | 0 | 0 | 0 | 0 | 0 | 0.000171 | 0 | 0 | 0 | k__Bacteria;p__MBNT15; |
| Planctomycetota | 0 | 0 | 0 | 0 | 0 | 0 | 0 | 0 | 0.000122 | 0 | 0 | 0 | k__Bacteria;p__Planctomycetota; |
| Zixibacteria | 0 | 0 | 0 | 0 | 0 | 0 | 0 | 0 | 0.000122 | 0 | 0 | 0 | k__Bacteria;p__Zixibacteria; |
| Others | 0 | 0 | 0 | 4.87E-05 | 4.44E-16 | 0.002363 | 0.001267 | 0 | 0.00631 | 2.44E-05 | 0.000146 | 0 | Others |

Table S4 Sequencing quality control sheets for all samples

| **Sample Name** | **Raw PE (#)** | **Combined (#)** | **Qualified (#)** | **Nochime (#)** | **Base (nt)** | **AvgLen (nt)** | **Q20** | **Q30** | **GC%** | **Effective%** |
| --- | --- | --- | --- | --- | --- | --- | --- | --- | --- | --- |
| Control1 | 76,344 | 73,792 | 73,480 | 59,890 | 25,028,239 | 418 | 97.6 | 92.58 | 53.48 | 78.45 |
| Control2 | 83,250 | 81,591 | 81,035 | 59,254 | 24,834,299 | 419 | 97.57 | 92.44 | 54.48 | 71.18 |
| Control3 | 84,567 | 83,868 | 83,270 | 62,726 | 26,208,038 | 418 | 97.54 | 92.34 | 54.67 | 74.17 |
| Control4 | 89,049 | 88,849 | 88,059 | 52,947 | 22,166,926 | 419 | 97.72 | 92.83 | 54.09 | 59.46 |
| Model1 | 87,723 | 86,217 | 85,564 | 62,584 | 26,292,848 | 420 | 97.62 | 92.44 | 54.71 | 71.34 |
| Model2 | 80,960 | 80,573 | 80,098 | 62,114 | 25,595,566 | 412 | 97.88 | 93.17 | 54.42 | 76.72 |
| Model3 | 83,476 | 81,308 | 80,899 | 64,890 | 26,893,759 | 414 | 97.65 | 92.6 | 54.24 | 77.73 |
| Model4 | 79,151 | 77,341 | 76,930 | 64,815 | 27,259,088 | 421 | 97.64 | 92.53 | 54.79 | 81.89 |
| TPS-H1 | 84,454 | 83,008 | 82,448 | 59,079 | 24,844,240 | 421 | 97.56 | 92.27 | 52.9 | 69.95 |
| TPS-H2 | 80,667 | 77,868 | 77,417 | 56,947 | 23,905,146 | 420 | 97.62 | 92.47 | 53.26 | 70.6 |
| TPS-H3 | 80,877 | 80,830 | 80,441 | 63,226 | 26,511,235 | 419 | 97.61 | 92.51 | 52.45 | 78.18 |
| TPS-H4 | 88,010 | 86,481 | 85,964 | 64,699 | 27,110,423 | 419 | 97.63 | 92.47 | 53.22 | 73.51 |

Description: Raw PE represents the PE reads of the original off machine; Combined is the spliced Tags sequence; Qualified is the sequence after Raw Tags filter low quality and short length; Nochime is the Tag sequence that is finally used for subsequent analysis after filtering chimeras, namely Effective Tags; Base is the number of bases in the final Effective Tags; AvgLen is the average length of Effective Tags; Q20 and Q30 are the percentages of bases with base quality values greater than 20 (sequencing error rate less than 1%) and 30 (sequencing error rate less than 0.1%) in Effective Tags; GC(%) represents the content of GC bases in Effective Tags; Effective(%) represents the percentage of the number of Effective Tags and the number of Raw PEs.
